# Supplementary material for: Seasonal Abundance of Psyllid Species on Carrots and Potato Crops in Spain
Source: MDPI journal article supplement (doi:10.3390/insects10090287), 2019-09-06
Supplement: s1 [file s1]

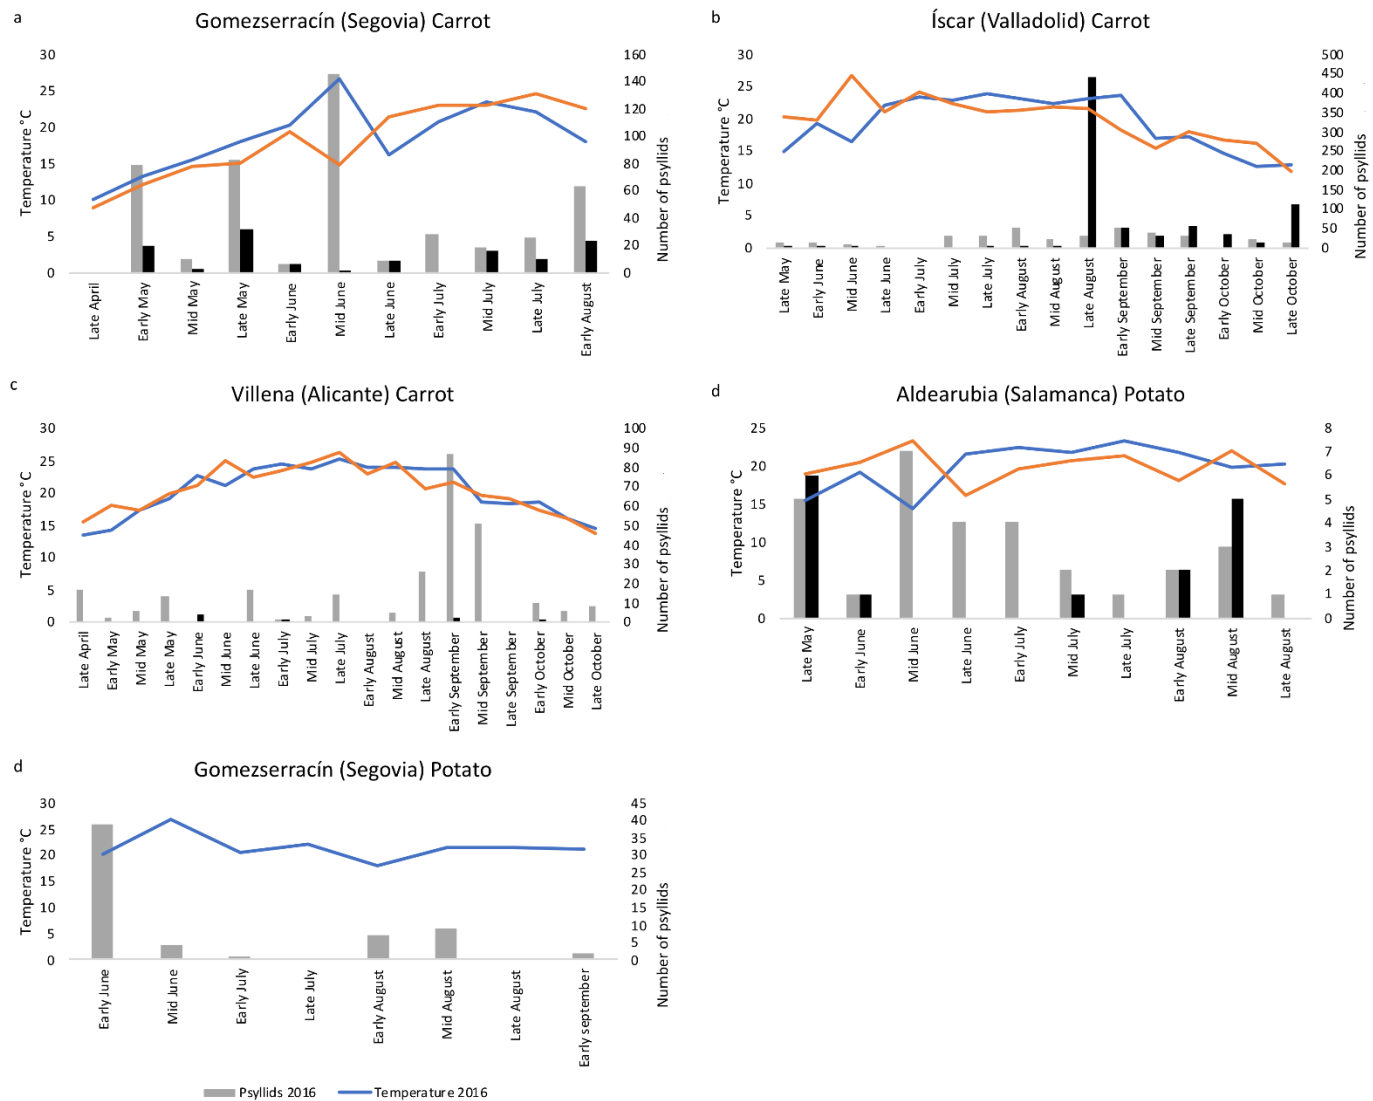

**Figure S2.** Total number of psyllids (*B. trigonica* + *B. nigricornis*) collected by green tile traps in 2016 (Gray bars) or 2017 (Black bars). Samples were collected in carrot fields, (a) Gomezserracín, (b) Íscar, (c) Villena or in potato fields, (d) Albearrubia and (e) Gomezserracín. Blue line represents average temperature in 2016 and orange line represent average temperature in 2017.
