# Supplementary material for: Seasonal Abundance of Psyllid Species on Carrots and Potato Crops in Spain
Source: MDPI journal article supplement (doi:10.3390/insects10090287), 2019-09-06
Supplement: s1 [file s1]

**Table S1.** NCBI accession numbers of the identified psyllid specimens collected on carrot and potato crops surveyed in 2015 and 2016

| Psyllid species                | Crop   | Sequence Length | NCBI<br>Accession number |
|--------------------------------|--------|-----------------|--------------------------|
| <i>Bactericera nigricornis</i> | Potato | 695             | MG719782                 |
| <i>Bactericera nigricornis</i> | Potato | 745             | MG719783                 |
| <i>Bactericera nigricornis</i> | Potato | 699             | MG719784                 |
| <i>Bactericera nigricornis</i> | Potato | 710             | MG719803                 |
| <i>Bactericera nigricornis</i> | Potato | 752             | MG719824                 |
| <i>Bactericera nigricornis</i> | Carrot | 702             | MG719805                 |
| <i>Bactericera nigricornis</i> | Carrot | 750             | MG719825                 |
| <i>Bactericera trigonica</i>   | Carrot | 704             | MG719787                 |
| <i>Bactericera trigonica</i>   | Carrot | 698             | MG719789                 |
| <i>Bactericera trigonica</i>   | Carrot | 701             | MG719790                 |
| <i>Bactericera trigonica</i>   | Carrot | 705             | MG719791                 |
| <i>Bactericera trigonica</i>   | Carrot | 701             | MG719792                 |
| <i>Bactericera trigonica</i>   | Carrot | 697             | MG719793                 |
| <i>Bactericera trigonica</i>   | Carrot | 700             | MG719794                 |
| <i>Bactericera trigonica</i>   | Carrot | 701             | MG719795                 |
| <i>Bactericera trigonica</i>   | Carrot | 700             | MG719796                 |
| <i>Bactericera trigonica</i>   | Carrot | 703             | MG719797                 |
| <i>Bactericera trigonica</i>   | Carrot | 676             | MG719788                 |
| <i>Bactericera trigonica</i>   | Carrot | 721             | MG719798                 |
| <i>Bactericera trigonica</i>   | Carrot | 708             | MG719804                 |
| <i>Bactericera trigonica</i>   | Carrot | 694             | MG719806                 |
