# Supplementary material for: Seasonal Abundance of Psyllid Species on Carrots and Potato Crops in Spain
Source: MDPI journal article supplement (doi:10.3390/insects10090287), 2019-09-06
Supplement: s1 [file s1]

**Table S2.** List of psyllid species occasionally found in the carrot and potato fields surveyed in 2016.

| Crop   | Location      | Sampling method | Psyllid species       | Date of sampling | Total number of insects |
|--------|---------------|-----------------|-----------------------|------------------|-------------------------|
| Carrot | Gomezserracín | Sweep net       | <i>B. tremblayi</i>   | Early July       | 1                       |
|        |               |                 | <i>B. tremblayi</i>   | Mid-July         | 1                       |
|        |               | Tile trap       | <i>B. tremblayi</i>   | Mid-May          | 1                       |
|        |               |                 | <i>B. tremblayi</i>   | Mid-June         | 1                       |
| Carrot | Íscar         | Sweep net       | <i>B. tremblayi</i>   | Late July        | 1                       |
|        |               |                 | <i>B. tremblayi</i>   | Early September  | 1                       |
|        |               | Tile trap       | <i>B. tremblayi</i>   | Late May         | 1                       |
|        |               |                 | <i>B. tremblayi</i>   | Early August     | 1                       |
| Carrot | Villena       | Sweep net       | <i>Trioza urticae</i> | Mid-May          | 2                       |
|        |               |                 | <i>Trioza remota</i>  | Mid-October      | 1                       |
|        |               | Tile trap       | <i>B. tremblayi</i>   | Early June       | 1                       |
|        |               |                 | <i>B. tremblayi</i>   | Late May         | 1                       |
| Potato | Aldearrubia   | Tile trap       | <i>T. urticae</i>     | Early June       | 1                       |
|        |               |                 | <i>T. urticae</i>     | Mid-June         | 1                       |
