# Supplementary material for: Seasonal Abundance of Psyllid Species on Carrots and Potato Crops in Spain
Source: MDPI journal article supplement (doi:10.3390/insects10090287), 2019-09-06
Supplement: s1 [file s1]

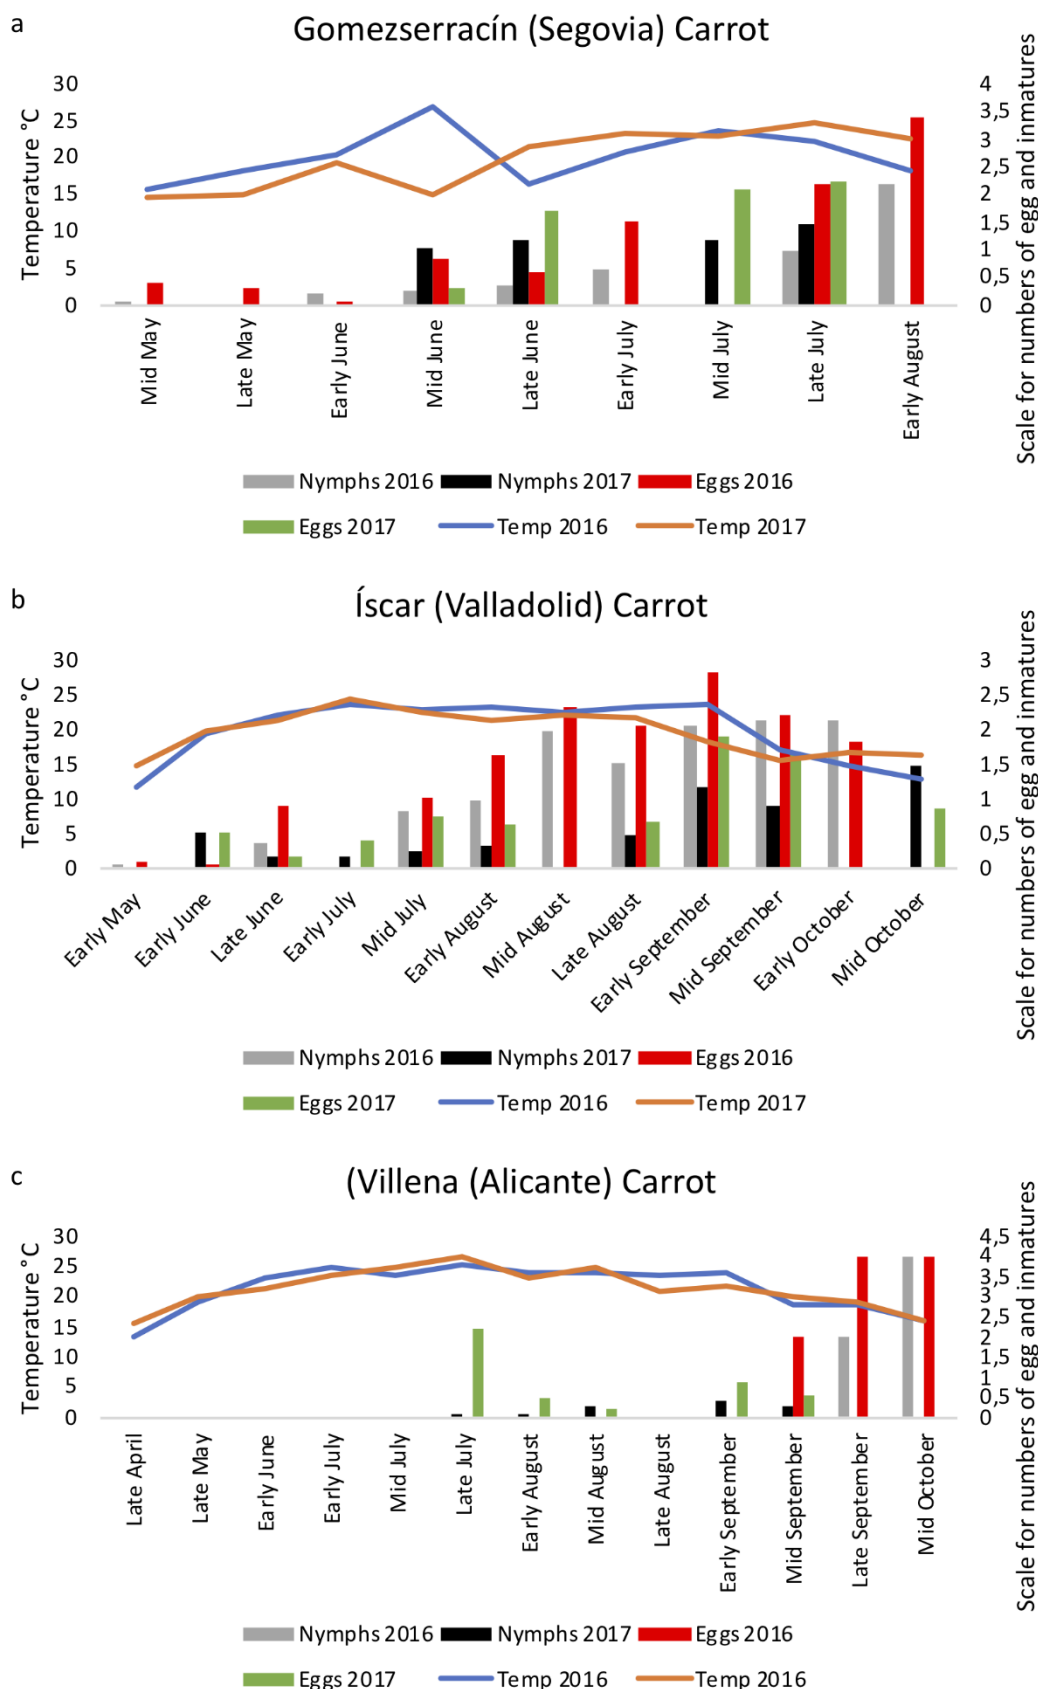

**Figure S3.** Number of eggs and immatures found in 2016 and 2017 in commercial carrot fields in (a) Gomezserracín, (b) Íscar and (c) Villena. Y-axis right represents scale values. Scale for eggs and nymphs used was: 0=0, 1=1-4, 2=5-20, 3=21-50, 4=more than 50. Y-axis left represent average temperatures.
